# Supplementary material
Source: HighWire-hosted journal article supplement (https://www.cmajopen.ca/highwire/filestream/84076/field_highwire_adjunct_files/1/2019-0171-1-at.pdf)
Supplement: 2019-0171-1-at.pdf [file 2019-0171-1-at.pdf]

| <b>Appendix 1 (as supplied by the authors):</b> Data files, coding system, and codes used to identify outcomes                                                                                                                        |                    |                       |                          |
|---------------------------------------------------------------------------------------------------------------------------------------------------------------------------------------------------------------------------------------|--------------------|-----------------------|--------------------------|
| Variable                                                                                                                                                                                                                              | Data File          | Classification System | Code                     |
| PCI                                                                                                                                                                                                                                   | Hospital Abstracts | ICD-9-CM              | 36.01-36.03, 36.05-36.07 |
|                                                                                                                                                                                                                                       |                    | CCI                   | 1.IJ.50, 1.IJ.57         |
| CABG                                                                                                                                                                                                                                  | Hospital Abstracts | ICD-9-CM              | 36.10-36.19              |
|                                                                                                                                                                                                                                       |                    | CCI                   | 1.IJ.76                  |
| AMI                                                                                                                                                                                                                                   | Hospital Abstracts | ICD-9-CM              | 410                      |
|                                                                                                                                                                                                                                       |                    | ICD-10-CA             | I21                      |
| CHF                                                                                                                                                                                                                                   | Hospital Abstracts | ICD-9-CM              | 428                      |
|                                                                                                                                                                                                                                       |                    | ICD-10-CA             | I50                      |
| Stroke                                                                                                                                                                                                                                | Hospital Abstracts | ICD-9-CM              | 430-438                  |
|                                                                                                                                                                                                                                       |                    | ICD-10-CA             | I60-I69                  |
| IHD                                                                                                                                                                                                                                   | Hospital Abstracts | ICD-9-CM              | 410-414                  |
|                                                                                                                                                                                                                                       |                    | ICD-10-CA             | I20-I22, I24, I25        |
| Note: AMI = acute myocardial infarction, CABG = coronary artery bypass graft, CHF = congestive heart failure, IHD = ischemic heart disease, PCI = percutaneous coronary intervention, ICD = International Classification of Diseases. |                    |                       |                          |
